# Supplementary material for: Replication Timing Uncovers a Two-Compartment Nuclear Architecture of Interphase Euchromatin in Maize
Source: Research Square preprint supplement (doi:10.21203/rs.3.rs-6116464/v1), 2025-03-12
Supplement: Supplementary file 1 [file 51295d34cd9d15626ec6b5cc.docx]

**Labeling Protocol (adapted from Arbor Bioscience)**

**Part 1. PCR Amplification of Immortal Library**

**1A. PCR Amplification and Debubbling**

- Briefly centrifuge myTags PCR Primer Mix tube and resuspend primers in 75 μl nuclease-free water. Final concentration will be 100 μM in 10 mM Tris-HCl and 0.1 mM EDTA pH 8.0.
- Briefly centrifuge myTags Immortal DNA Library tube and resuspend myTags Immortal Library at 1 ng/μl by adding 200 μl 10 mM Tris-HCl pH 7.5 or nuclease-free water. Prepare working stock aliquots (0.07 ng/μl) by diluting 2 μl of immortal library in 26 μl nuclease-free water.
- Assemble the master mix and debubbling mix in separate 0.2 ml PCR reaction tubes as indicated in the table. Scale up according to the desired number of reactions and use 1.5 ml tubes if necessary.

| Components (1 reaction) | Master Mix | Debubbling Mix |
| --- | --- | --- |
| 2X KAPA HIFI Hotstart Readymix | 25 μl | 10 μl |
| myTags PCR Primer Mix | 0.25 μl | 1.2 μl |
| Nuclease-free water | 24.75 μl | 8.8 μl |
| Total | 50 μl | 20 ul |

- Mix by pipetting and spin down in a mini centrifuge for 5 sec.
- Set the debubbling mix aside on ice or at 4°C.
- Pipet 5 μl of the master mix into a third 0.2 ml PCR tube as a negative control (optional). Assemble the template master mix by adding 2.5 μl of the working stock myTags immortal library template (0.07 ng/μl) to the remaining 45 μl of master mix and mix by pipetting. Spin down 5 seconds in a mini centrifuge.
- Perform PCR Cycle (Program 1) on both the negative control and template master mix in thermocycler. Use a hot lid (+5°C).
- To visualize PCR product: Before PCR cycle is complete, pour a 1.8% agarose 1X TAE gel with sufficient wells for a DNA ladder and your PCR samples including the negative control.
- At step 6 of the PCR Cycling Conditions, leave the negative control in the thermocycler at 24°C and remove the template master mix. Add 20 μl debubbling mix to the template master mix, mix by pipetting and briefly spin in a mini centrifuge. Return sample to the thermocycler and continue with Program 2 for both the template master mix + debubbling mix (hereafter "PCR sample") and the negative control.
- At the completion of the PCR, store both the negative control and the PCR sample at -20°C or proceed to the next step.

| **PCR cycle** | | |
| --- | --- | --- |
| Program 1 | 1 | 95°C 3 min |
| 2 | 98°C 20 sec |
| 3 | 56°C 15 sec |
| 4 | 72°C 30 sec |
| 5 | Go to step 2 19 more times |
| 6 | Hold at 24°C |
| Program 2 | 7 | 95°C 3 min |
| 8 | 98°C 20 sec |
| 9 | 56°C 15 sec |
| 10 | 72°C 30 sec |
| 11 | Go to step 8 1 more time |
| 12 | Hold at 24°C |

**1B. Agarose Gel Electrophoresis**

- After PCR cycling is complete, mix 2 μl of a non-denaturing gel loading buffer (such as 6X NEB Loading buffer included with the low molecular weight DNA ladder) with 5 μl of the PCR sample. Adjust volume to 12 μl with nuclease-free water to make the PCR gel sample.
- Add 1 μl of the non-denaturing gel loading buffer to the 5 μl negative control gel sample.
- Load the library PCR gel sample, negative control gel sample, and the NEB low molecular weight ladder in separate wells on a 1.8% agarose 1X TAE or TBE gel to verify the length of the PCR product. The expected band size of the desired PCR product for the PCR sample is 99 bp (for probe length of 45 nt). The negative control sample should show no bands at 99 bp, however you may see a primer band around 40-50 bp.
- After verifying the PCR product length of 99 bp and the absence of a 99 bp band in the negative control gel sample, continue to the next step.

**1C. DNA Purification – Qiagen QIAquick PCR Purification Kit**

- Place a QIAquick spin column in a 2 ml collection tube.
- Transfer PCR sample to a 1.5 ml tube and bring the volume up to 100μl with 35 μl nuclease-free water. Add 500 μl of Qiagen Buffer PB to the sample and vortex for 5 sec.
- Apply the entire 600 μl sample to the QIAquick column and spin for 1 min at 17,900 RCF in a microcentrifuge.
- Discard flow-through, return the QIAquick column to the collection tube.
- Add 700 μl of Qiagen Buffer PE (with ethanol added) to the QIAquick column and spin for 1 min at 17,900 RCF.
- Discard flow-through, return the QIAquick column to the collection tube and spin for an additional 3 min at 17,900 RCF.
- Discard collection tube. Place the QIAquick column in a labeled 1.5 ml microcentrifuge tube and add 30 μl of nuclease-free water to the center of the QIAquick matrix. Let the column stand for 1 min then spin for 1 min at 17,900 RCF in a microcentrifuge to elute the dsDNA.
- Quantify the purified dsDNA using a Nanodrop or another absorbance-based method. Record dsDNA concentration, A260/280 and A260/230 values. A260/280 value should be between 1.8-2.0 and A260/230 value should be 1.8-2.3. Significant deviation from these values could signal contaminants that may compromise the in vitro T7 Transcription step (likely due to salt or ethanol). A minimum yield of 480 ng dsDNA is required for in vitro transcription (Part 2). If the concentration is less than 30 ng/μl, drying down the dsDNA template will be necessary to fit an appropriate volume in the T7 transcription reaction.
- Store dsDNA at -20°C or proceed to Part 2: In Vitro Transcription.

Part 2. In vitro Transcription
 2A. In vitro Transcription – MEGAshortscript TM T7 Kit

- Follow MEGAshortscript TM T7 kit instructions with the following modifications to the initial reaction mix. Thaw 10X reaction buffer and rNTPs at room temperature, place kit components on ice immediately after use. Vortex 10X reaction buffer briefly prior to use. Inspect 10X reaction buffer for precipitate, if present heat at 37°C 10 minutes and vortex to dissolve precipitate.
- In a 0.2 ml tube, assemble the in vitro transcription (IVT) mix at room temperature in the order given below.

| **Components** | **In Vitro Transcription mix** |
| --- | --- |
| Nuclease free water (16 μl - vol of DNA) | _μl |
| T7 10X reaction buffer | 4 μl |
| rNTP Mix | 16 μl |
| 480 gn dsDNA Template | _μl |
| T7 Enzyme Mix | 4 μl |
| Total | 40 μl |

- Mix by pipetting and quick spin down in a mini centrifuge for 5 sec.
- Incubate at 37°C for 4 hr (with hot lid on, set to 42°C) to generate the IVT sample. It is not necessary
- to treat the RNA with DNase.
- Store transcription reactions containing RNA at -80°C or proceed to the next step.

**2B. RNA Purification – Macherey-Nagel RNA Clean-Up Mini Kit**

- Before starting this purification, be sure to check if 100 ml of 100% ethanol was added to Wash Buffer RA3.
- Assemble as many Nucleospin RNA clean-up columns and collection tubes as needed (one per transcription reaction). Also, obtain one 1.5 ml tube per reaction and label all tubes, columns, collection tubes accordingly.
- Add 60 μl nuclease-free water to the transcription reaction from Part 2A for a total volume of 100 μl. Mix 300 μl Buffer RA1 with 300 μl 100% ethanol for each transcription reaction in a 1.5 ml tube.
- Add the 100 μl transcription reaction from step 6 to the prepared RA1/Ethanol mix from step 8. Mix the solution with a pipette and transfer the entire volume to a NucleoSpin RNA clean-up column. Centrifuge 1 min. at 8000 RCF. Discard flow-through from the collection tube.
- 1st Wash: Add 700 μl Buffer RA3 to the Nucleospin column and centrifuge 1 min. at 8000 RCF. Discard flow-through from the collection tube.
- 2nd Wash: Add 350 μl Buffer RA3 to the Nucleospin column and centrifuge 2 mins at 8000 RCF. Discard flow-through from the collection tube.
- Place the column into a new, labeled, 1.5 ml tube. Open the column lid and let air dry for 3 min.
- Add 50 μl RNase-free water directly to the center of the column, let sit 1 min. and centrifuge 2 mins at 8000 RCF.
- Remove columns and quantify the RNA using a Nanodrop or similar UV absorbance-based method.
- Concentration should be 1 μg/μl or greater or drying down the RNA and resuspending in a smaller volume may be required prior to Part 3.
- Store the RNA sample at -80°C or proceed to Part 3: Reverse Transcription.

**Part 3. Reverse Transcription**

*Fluorophores are light-sensitive. Minimize light exposure of the labeled primer stock and the sample.*

**3A. Reverse Transcription - SuperScript IV Reverse Transcriptase**

- In a 0.2 ml tube, assemble Mix 1 at room temperature. Mix by pipetting, spin down for 5 seconds in a mini centrifuge.

| **Components** | **Mix 1** |
| --- | --- |
| 52 μg RNA, add nuclease free water to the volume | 42 μl |
| Labelled primer 1mM (1 nmol/ul) | 2.0 μl |
| dNTPs 10 mM | 15 μl |
| SUPERase-in 20 U/μl | 1 μl |
| Total | 60 μl |

- Incubate in a thermocycler at 65°C (with hot lid on, set to 75°C) for 5 minutes, then chill on ice for 5 min. While waiting, proceed to step 3.
- In a 0.2 ml PCR tube, assemble Mix 2 at room temp. Thaw 5X buffer and DTT at room temperature. Vortex 5X buffer and check for precipitate. If present, heat at 37°C for 5 minutes and vortex buffer (repeat until most or all precipitate is dissolved). A master mix can be prepared for Mix 2 in a 1.5 ml tube to save time.

| **Components** | **Mix 1** |
| --- | --- |
| Nuclease free water | 6.5 μl |
| 5X RT buffer | 20 μl |
| 0.1 M DTT | 10 μl |
| SUPERase-in 20 U/μl | 1 μl |
| SuperScript IV Reverse Transcriptase | 2.5 μl |
| Total | 40 μl |

- Mix by pipetting, spin down for 5 sec in a minicentrifuge and store at room temperature while waiting for step 2 to complete.
- Following the completion of steps 1-4, add Mix 2 to Mix 1 to assemble the Reverse Transcription (RT) Mix. Mix by pipetting and spin down for 5 sec in a mini centrifuge.
- Incubate the reaction at 50°C (with hot lid on, set to 55°C) for 2 hr.
- Store the RT sample at -20°C or proceed to the next step.

**3B. Unincorporated Primer Digestion with Exonuclease I**

- These steps are time-sensitive, after completing each step, proceed immediately to the next step.
- Thaw Exonuclease I buffer at room temperature. Add 11 μl of Exonuclease I Buffer to the RT sample.
- Add 2 μl of Exonuclease I to the RT sample.
- Mix by pipetting and spin down for 5 sec in a mini centrifuge.
- Incubate in a thermocycler at 37°C for 15 min.
- Remove RT sample from the thermocycler and preheat the thermocycler to 80°C.
- Add 12 μl 0.5 M EDTA pH 8.0 to RT sample, mix by pipetting and spin for 5 sec in a mini centrifuge.
- Incubate at 80°C in a pre-heated thermocycler for 20 min. Place on ice to cool for 5 min.
- Store the resulting RNA:DNA hybrid product at -20°C or proceed to step 16.

**3C. RNA:DNA Hybrid Purification - Zymo Quick-RNA Miniprep Kit**

- Place a Zymo-SpinTM III CG spin column in a 2 ml collection tube.
- In a 1.5 ml tube, mix 500 μl Zymo RNA Lysis Buffer and 125 μl RT sample. Mix by pipetting.
- Add 625 μl 96-100% ethanol. Mix by pipetting.
- Transfer 625 μl to the Zymo-SpinTM III CG spin column and centrifuge for 30 sec at 11,000 RCF. Discard flow-through.
- When a fluorescent primer is used, the flow-through will likely appear colored which indicates successful removal of excess primer. Typically, the color is also visible in the column matrix due to the binding of the RNA:DNA hybrid that is also labeled (note not all fluorescent dyes can be easily seen in the gel matrix, Atto488 for example can be hard to see).
- Repeat step 19 once to load the remainder of the sample on the Zymo-SpinTM III CG spin column. Add 400 μl Zymo RNA Prep Buffer to the spin column and centrifuge at 11,000 RCF for 30 sec. Discard flow-through.
- Add 700 μl Zymo RNA Wash Buffer to the spin column and centrifuge at 11,000 RCF for 30 sec. Discard flow-through.
- Add 400 μl Zymo RNA Wash Buffer to the spin column and centrifuge at 11,000 RCF for 30 sec. Discard flow-through.
- Place the spin column back into the collection tube and centrifuge at 11,000 RCF for 3 min. Discard collection tube with flow-through.
- Place the spin column into a new 1.5 ml tube.
- Add 42 μl room temperature nuclease-free water to the spin column matrix, wait 1 min, and then centrifuge at 11,000 RCF for 1 min to elute RNA:DNA hybrid.
- Repeat step 26.

Store eluate at -20°C or proceed to Part 4: RNA Digestion.

**Part 4: RNA Digestion of RNA:DNA Hybrid**

**4A. RNA Digestion - RNase H and RNase A**

- Thaw the 10X RNase H buffer at room temperature and vortex. If precipitate is present in the buffer, heat at 37°C for 10 minutes and vortex to dissolve the precipitate.
- In a 0.2 ml tube, assemble the RNA digestion mix at room temperature. A master mix can also be made and then aliquoted into individual 0.2 ml tubes.

| **Components** | **RNA digestion Mix** |
| --- | --- |
| 10X RNase H buffer | 10 μl |
| 5U/μl RNase H | 4 μl |
| 5U/μl RNase A | 4 μl |
| Total | 18 μl |

| **RNA Digestion Program** | | |
| --- | --- | --- |
| **Step** | **Temprature** | **Time** |
| 1 | 37°C | 120 min |
| 2 | 70°C | 20 min |
| 3 | 50°C | 60 min |
| 4 | 95°C | 5 min |
| 5 | Ramp down 95°C to 50°C | 0.1 °C/sec |
| 6 | 50°C | 60 min |
| 7 | 4°C | Hold |

- Mix by pipetting and spin down in a minicentrifuge for 5 sec.
- Add all eluted RNA:DNA hybrid (~82-84 μl) from Part 3C to the 18 μl of RNase digestion mix in a 0.2 ml tube.
- Mix by pipetting and spin down in a minicentrifuge for 5 sec.
- Incubate in a thermocycler using the RNA Digestion Program with the hot lid on.
- Store at -20°C or proceed to the next step.

**4B. ssDNA Purification - Zymo Quick-RNA**

- Preheat a minimum of 120 μl of nuclease-free water per reaction in 0.2 ml tubes at 65 ̊C on a thermocycler .
- Place a Zymo-SpinTM IIICG spin column in a 2 ml collection tube.
- In a1.5ml tube, mix 400 μl Zymo RNA Lysis Buffer and 100 μl RNA digestion sample. Mix by pipetting.
- Add 500 μl 100% ethanol. Mix by pipetting. Transfer 650 μl to the Zymo-Spin TMIII CG column and centrifuge for 30 sec at 11,000 RCF. Discard flow- through.
- Repeat step 12 once to load the remainder of the sample on the column.
- Add 400 μl Zymo RNA Pre pBuffer to the column and centrifuge at 11,000 RCF for 30 sec. Discard flow- through.
- Add 700 μl Zymo RNA Wash Buffer to the column and invert 3 times to remove salt from the entire column. Centrifuge at 11,000 RCF for 30 sec. Discard flow-through.
- Repeat step15.
- Add 400 μl Zymo RNA Wash Buffer to the column and centrifuge at 11,000 RCF for 30 sec. Discard flow-through.
- Place the column back into the collection tube and centrifuge at 11,000 RCF for 3 min. Discard collection tube with flow-through.
- Place the column in a new labeled 1.5 ml tube.
- Add 50 μl of pre-heated (65 ̊C) nuclease-free water to the Zymo-SpinTM IIICG column matrix, wait 1 min, and then centrifuge at 11,000 RCF for 1 min to elute the labeled ssDNA.
- Using a Nanodrop, measure the concentration of dye (pmol/μl) and single-stranded nucleic acid (ng/μl) of the labeled ssDNA under the Microarray setting with ssDNA selected from the dropdown menu. Select the dye from the Dye 1 dropdown menu prior to loading your sample. You may need to enter the appropriate molar extinction coefficient for your dye of choice using the dye/chromophore edit option on the Nanodrop software main page. Record both the ssDNA concentration and the pmol/μl dye concentration.
- Recover the labeled ssDNA sample from the Nanodrop to analyze on 7% denaturing Urea PAGE gel if desired. Alternatively run the ssDNA on a 1.8% agarose 1X TBE gel with samples and a low molecular weight DNA ladder heated at 95°C in a formamide containing loading buffer (such as from the Ambion T7 transcription kit) for 5 minutes and put on ice. The expected band size for labeled ssDNA is 66nt. Note that the 5’ label may impact the mobility of the ssDNA.
- To determine dye labeling efficiency, convert the ssDNA concentration in ng/μl to pmol/μl and compare with dye pmol/μl. If the ratio for pmol/ μl dye : pmol/ μl ssDNA is not 0.9 or higher, repeat Part 4: RNase Digestion. Note: Biotin or DIG labeling efficiency cannot be calculated in this manner.
