# Supplementary material for: Replication Timing Uncovers a Two-Compartment Nuclear Architecture of Interphase Euchromatin in Maize
Source: Research Square preprint supplement (doi:10.21203/rs.3.rs-6116464/v1), 2025-03-12
Supplement: Supplementary file 2 [file a2a7f6ac295a35c853c06260.docx]

**Protocol for HiC library preparation:**

Turn on the water bath at 62°C. Also prepare a rotating incubator at 37°C.

Prepare 1X NEBuffer3, NEBuffer3.1 and NEBuffer1.1.

**RE digestion:**

1. Centrifuge the nuclei at 9000 xg for 5 minutes at 4°C. Discard the supernatant and resuspend the nuclei in chilled 400 µl of 1X NEBuffer3.
2. Centrifuge again at 9000 xg for 5 minutes at 4°C. Discard the supernatant and resuspend the pellet in 250 µl of 1X NEBuffer3 (supplemented with 1X protease inhibitor). Add 5 µl of 10% SDS (0.2% final) and mix nuclei by gentle pipetting (minimize the air bubble).
3. Incubate nuclei at 62°C for 5 min in a water bath.
4. After incubation, add 265 µl of 1X NEBuffer3 to bring the SDS down to less than 0.1%
5. Add 52 µl of 10% triton-x100 to bring the final concentration 1%.
6. Incubate at 37°C for 15 min in a rotating incubator to quench SDS.
7. Gently spin down the nuclei at 1000 xg for 5 min at 4°C.
8. Resuspend nuclei in 400 µl of 1X NEBuffer 3.1 and spin down again at 1000 xg for 5 min at 4°C.
9. Resuspend again in 100 µl of 1X NEBuffer 3.1 and add 5 µl of DpnII (10U/µl).
10. Incubate the reactions for at least 4 hours preferably overnight at 37°C in a rotating incubator.

Turn on water bath at 62°C

**DNA ligation and reverse crosslinking:**

1. Inactivate the DpnII by incubating the tubes at 62°C for 20 min (Water bath)
2. Add 1 µl of 10mM dNTPs minus dC, 25 µl of 0.4mM biotin-14-dCTP, 3 µl of 10X NEBuffer3.1 and 4 µl of Klenow fragment (10U/µl).
3. Incubate at RT for 4 hrs on a rotator.
4. Centrifuge the nuclei at 1000 xg for 5 min at 4°C. Carefully remove the supernatant without disturbing the pellet.
5. Resuspend pellet in 500 µl of 1X T4 DNA ligase mix containing followings

20% BSA (1X in final volume)

100X inhibitor (1X)

10% triton (0.1%)

10X ligase buffer (1X)

ddH20

1. Add 3 µl of T4 DNA ligase and incubate at room temperature for 4 hours on a rotator.
2. Spin down the nuclei at 1000 xg for 5 min at 4°C. Discard the supernatant.
3. Resuspend the pellet with 200 µl of 1X NEBuffer 1.1 and add 2 µl of exonuclease-III (100U/µl) to chew back exposed overhangs of DPnII and incubate at 37°C for 10 min.
4. Spin down the nuclei at 1000 xg for 5 min at 4°C. Discard the supernatant and resuspend the pellet with 500 µl of reverse crosslinking buffer. Add 5 µl of proteinase K (800U/ml) and incubate at 55°C for 60 min.
5. Transfer the tube to a 65°C incubator and incubate overnight.

**RNAse treatment and DNA purification:**

1. Take out the tube from the incubator and add 1µl RNAse A (10mg/ml) and incubate at 37°C for 30 min to remove RNA.
2. To purify DNA, add equal volume of chloroform and mix by vortex and centrifuge at 10,000 xg at 4°C for 5 min.
3. Transfer the upper aqueous phase to a new tube and add 1/10 volume of 3M sodium acetate, 1µl of LPA (10mg/ml) and equal volume of isopropanol.
4. Mix by inversion and incubate in -20°C for 2 hours.
5. Spin down the DNA at maximal speed >20,000 xg for 20 min at 4°C. Discard the supernatant carefully without disturbing the pellet.
6. Wash the pellet with 80% ethanol. Air dry the pellet and dissolve it with 100 µl of ddH2O.
7. Check the DNA concentration in nanodrop.

**Preparation for Sonication:**

Prepare this reaction in PCR tubes

1. Start with 1-2 µg DNA (depends on DNA concentration in the previous step) in 100ul. Add 10 µl of 10X NEBuffer2, 1 µl 10mM dNTPs minus dC and dG and 2 µl T4 DNA polymerase. Incubate the reaction at 20°C for 2 hours. Terminate the reaction by adding 5 µl EDTA.

**Ampure XP-Beads purification (1.8X to purify whole DNA without any size selection):**

1. Keep 216 µl per reaction Ampure-xp beads at RT for at least 30 min before use.
2. Add the DNA sample in xp beads and gentle vortex.
3. Allow beads to set at RT for 5 min.
4. Short spin the tube to make sure there is no bead on the lid.
5. Open the microfuge tube lid.
6. Transfer the tube to the magnetic rack carefully because the lid is open.
7. Keep it there till the solution is cleared.
8. Ampure beads will bind to the wall and the solution will become clear.
9. Remove the solution and add 200 µl 80% ethanol.
10. Again carefully remove the 80% ethanol and add it one more time to give 2 total ethanol washes.
11. After the last wash, spin down and put it again in the magnetic rack to remove the last droplet of ethanol.
12. Dry the beads at 37°C for 3-5 min until you see cracks in the beads.
13. Elute DNA in 55 µl of TE. Add 55 µl of TE and redissolve beads. Keep it at RT for 2-3 min.
14. Put it again in the magnetic rack.
15. Transfer the TE with DNA to a new tube**.**

**Sonication:**

1. Transfer 55 µl of DNA (TE) in covaris tube and sonicate it 70-90S to get 300-400 bp fragments by using covaris M220.

**NEB end repair and dA tailing:**

1. Take a sterile nuclease-free PCR tube and prepare a reaction on Ice:

| **Volume** | **Components** |
| --- | --- |
| 3 µl | (green) NEBNext Ultra II end prep enzyme mix |
| 7 µL | (green) NEBNext Ultra II end prep reaction buffer |
| 50 µL | Fragmented DNA |
| 60 µL | Total |

1. Set the pipette to 50 µL, pipette 50 µl up and down at least 10 times to mix thoroughly (avoid introducing bubbles).
2. Pop-spin to collect all liquid from the side of the tube.
3. Place in a thermal cycler with a heated lid set to >= 75°C and run the following program.

30 minutes at 20°C

30 minutes at 65°C

Hold at 4°C

1. Perform Ampure beads cleanup (0.8X) and elute DNA with 50 µL of TE and transfer to a new 1.5 mL tube.
2. Take 10 µL of Dynabeads and wash them with 150 µl of 1x binding buffer three times and then resuspend beads with 50 µl of 2X high salt binding buffer.
3. Add these 50 µl 2X high salt binding buffer beads to the eluted DNA and incubate bind at RT for 1 hour on a rotator.
4. Place the tube on a magnetic rack for 1-2 min and discard the supernatant. Wash the beads with 150 µl of 1X binding buffer three times.
5. Wash the beads with TE (supplemented with 0.1% Tween 20).
6. Resuspend the beads with 62 µl 1X NEBNext ultra end prep reaction buffer.

**Adapter Ligation on beads:**

1. Check the DNA concentration by qubit in order to proceed towards next step
2. Prepare the adapter dilution according to DNA input. If DNA input is less than 100 ng then dilute the NEBNext Adapters in 10mM Tris-HCl, pH 7.5-8

*100 ng-5 ng input 10 fold (1:10) 1.5uM adapter conc.*

*Less than 5 ng 25 fold (1:25) 0.6uM adapter conc.*

1. Add the following components directly to the end prep reaction mixture in PCR tube:

| **Volume** | **Components** |
| --- | --- |
| 60 µl | End prep reaction mix on beads (step10) |
| 2.5 µl | (red) NEBNext Adapter for illumina |
| 30 µl | (red) NEBNext Ultra II Ligation master mix |
| 1 µl | (red) NEBNext Ligation enhancer |
| 93.5 µl | Total volume |

1. Set the pipette to 80 µl and then pipette the entire volume up and down at least times to mix thoroughly. (Ligation master mix is very viscous. Care should be taken to ensure adequate mixing of ligation reaction)
2. Incubate at 20°C for 15 minutes in a thermocycler with the heated lid off.
3. Add 3 µl of (red or blue) USER enzyme to the ligation mixture from step 12.
4. Mix well and incubate at 37°C for 15 minutes with heated lid set to >=47°C
5. Shift the sample to 1.5 ml tube and place the tube on a magnetic rack for 2 minutes and discard the supernatant. Wash the beads 3 times with 150 µl of 1X binding buffer.
6. Resuspend the beads with 150 µl of TE supplemented with 0.1% tween 20. Transfer the beads to a new tube and wash again three times with TE supplemented with 0.1% Tween 20.
7. Resuspend beads into 17 µl of 0.1X TE for PCR.

**Indexing and library sequencing:**

1. The library on the beads will be used in a 50 μL PCR reaction: 5 μL of forward primer, 5 μL of reverse primer and 25 ul of Q5 reaction mixture.
2. Run PCR with the following program: 98°C denature for 30 s 1 cycle, then 10 cycles of amplification: 98°C for 10 s, 65°C for 75 s, 72°C for 20 s, and finally 65°C for 1 min, hold at 4°C.
3. Recover the supernatant on the magnetic rack and discard the beads.
4. Libraries are quantified by Qubit dsDNA HS fluorimetry and KAPA qPCR. DNA fragment size distribution is analyzed on an Agilent High Sensitivity D1000 Screentape assay.
5. An equimolar pool of all root tip and earshoot libraries was prepared
6. An aliquot of this pool was paired-end 150 sequenced on a Novaseq S1 flow cell in the FSU College of Medicine Translational Science Lab.
